# Supplementary material for: Characteristics of Hepatitis B Virus Genotype and Sub-Genotype in Hepatocellular Cancer Patients in Vietnam
Source: MDPI journal article supplement (doi:10.3390/diagnostics12102393), 2022-10-01
Supplement: s1 [file s1]

## Supplementary data

**Table S1:** Primers used for complete genome DNA amplification and sequencing

|                | Primer    | Sequence (5'-3')                              | Position    | %<br>GC | Tm (°C) | Size<br>(bp) |
|----------------|-----------|-----------------------------------------------|-------------|---------|---------|--------------|
| First<br>round | HBV1 (a)  | CCGGAAGAATTCTTTTTCACCTCTGCCTAATCA             | 1820 -1841  | 42      | 55      | 3215         |
|                | HBV4R     | CCGGAGAGCTCATGCTCTTCAAAAGTTGCATGGT<br>GCTGGTG | 1824 - 1804 | 54      | 60      |              |
| A              | HBV1 (a)  | CCGGAAGAATTCTTTTTCACCTCTGCCTAATCA             | 1820 - 1841 | 42      | 55      | 497          |
|                | BG1R (a)  | ATAGGGGCATTTGGTGGTCT                          | 2316 - 2297 | 50      | 58      |              |
| B              | HBC1 (a)  | AGTGTGGATTCGCACTCCT                           | 2269 - 2287 | 53      | 59      | 828          |
|                | PS8R (a)  | ARGCCCTGAGCCTGAGGGCTC                         | 3096 - 3078 | 69      | 60      |              |
| C              | P1 (a)    | TCACCATATTCTTGGAACAAGA                        | 2817 - 2839 | 39      | 55      | 1103         |
|                | S1-2 (a)  | CGAACCACTGAACAAATGGC                          | 704 - 685   | 50      | 56      |              |
| F              | 251F (b)  | GACTYGTGGTGGACTTCTC                           | 251 - 269   | 55      | 56      | 940          |
|                | 1190R (b) | TCAGCAAAYACTYGGCA                             | 1190 - 1174 | 47      | 53      |              |
| G              | 595F (b)  | CACHTGTATTCCCATCCCA                           | 595 - 613   | 47      | 53      | 1231         |
|                | HBV2 (a)  | CCGGAAGAATTCAAAAAGTTGCATGGTGCTGG              | 1825 - 1806 | 47      | 58      |              |
| E              | HBx1      | GTCCCCTTCTTCATCTGCCGT                         | 1487 – 1507 | 57      | 61      | 339          |
|                | HBV2 (a)  | CCGGAAGAATTCAAAAAGTTGCATGGTGCTGG              | 1825 - 1806 | 47      | 58      |              |

**Note:** Primers (a) are from Huy TTT et al. (2004) [19]; Primers (b) are from Wang Y et al. (2021) [28].

**Table S2:** GenBank accession numbers of reference sequences of HBV genotype.

| HBV Genotype | Sub-genotype | Accession number | Nationality |
|--------------|--------------|------------------|-------------|
| A            | A1           | HE974370         | France      |
|              |              | AB937795         | Japan       |
|              | A2           | HE974383         | France      |
|              |              | AB937797         | Japan       |
|              | A3           | AM184126         | France      |
|              |              | AM184125         | France      |
|              | A5           | FJ692612         | Haiti       |
|              |              | FJ692603         | Haiti       |
| B            | A6           | GQ331048         | Africa      |
|              |              | GQ331046         | Africa      |
|              | B1           | AB602818         | Japan       |
|              |              | AB828708         | Japan       |
|              | B2           | AB981583         | Japan       |
|              |              | AB555499         | Taiwan      |
|              | B3           | GQ358136         | Indonesia   |
|              |              | AB976562         | Indonesia   |
|              | B4           | GQ924626         | Malaysia    |
|              |              | LC456112         | Cambodia    |
|              | B5           | GQ924640         | Malaysia    |
|              |              | GQ924645         | Malaysia    |
|              | B6           | KP659252         | Canada      |
|              |              | KP659224         | USA         |
|              | B7           | GQ358142         | Indonesia   |
|              |              | GQ358139         | Indonesia   |
| C            | B8           | GQ358147         | Indonesia   |
|              |              | GQ358151         | Indonesia   |
|              | B9           | GQ358148         | Indonesia   |
|              |              | KP341013         | Indonesia   |
|              | C1           | MG826122         | China       |
|              |              | <i>AB112063</i>  | Viet Nam    |
|              | C2           | AB368296         | Japan       |
|              |              | AB981580         | Japan       |
|              |              | LC155815         | Japan       |
|              | C3           | MG826125         | China       |
|              | C4           | MG826127         | China       |
|              |              | MG826126         | China       |
|              | C5           | EU410081         | Philippine  |

|   |     |                 |             |
|---|-----|-----------------|-------------|
|   |     | EU410079        | Philippine  |
|   | C6  | EU670263        | Philippine  |
|   |     | GU721029        | South Korea |
|   | C7  | LC416040        | Indonesia   |
|   | C8  | MG826137        | China       |
|   |     | MG826132        | China       |
|   |     | MG826135        | China       |
|   | C9  | AP011108        | Indonesia   |
|   | C10 | AB540583        | Indonesia   |
|   |     | AB540585        | Indonesia   |
|   | C11 | AB554019        | Indonesia   |
|   | C12 | <i>AB560662</i> | Indonesia   |
|   |     | <i>AB554025</i> | Indonesia   |
|   | C13 | AB644280        | Indonesia   |
|   |     | AB644281        | Indonesia   |
|   | C15 | AB644286        | Indonesia   |
|   | C16 | AB644287        | Indonesia   |
| D | D1  | GU456684        | Iran        |
|   |     | LC365689        | Japan       |
|   |     | FJ386590        | China       |
|   | D2  | GQ477453        | Poland      |
|   |     | EU594432        | Russia      |
|   |     | GU456635        | Iran        |
|   | D3  | HE974377        | FRANCE      |
|   |     | GQ922000        | Canada      |
|   |     | FJ692507        | Haiti       |
|   | D4  | KF192841        | India       |
|   |     | MN365240        | Russia      |
|   |     | GQ922003        | Canada      |
|   | D5  | GQ205377        | India       |
|   |     | KP322603        | India       |
|   |     | MK516279        | India       |
|   | D6  | KF170740        | Sudan       |
|   | D7  | FJ904416        | Tunisia     |
|   |     | FJ904398        | Tunisia     |
|   |     | FJ904408        | Tunisia     |
|   | D8  | FN594769        | Niger       |
|   |     | FN594771        | Niger       |
| E |     | FN594748        | Niger       |

|                          |    |          |            |
|--------------------------|----|----------|------------|
|                          |    | AB091255 | Japan      |
| F                        | F1 | EU670262 | Peru       |
|                          |    | FJ709464 | Chile      |
|                          | F2 | DQ899146 | Venezuela  |
|                          |    | HE974369 | Martinique |
|                          | F4 | KJ676694 | Argentina  |
| G                        |    | AB056514 | Japan      |
|                          |    | GU563556 | Belgium    |
| H                        |    | LC491577 | Japan      |
|                          |    | AB846650 | Japan      |
| I                        | I1 | FJ023659 | Laos       |
|                          | I2 | FJ023664 | Laos       |
| J                        |    | AB486012 | Japan      |
| Outgroup<br>Wolly Monkey |    | NC028129 |            |
